# Supplementary material
Source: PubMed Central journal article supplement (PMC8089038)
Supplement: NIHMS1671182-supplement-1.pdf [file NIHMS1671182-supplement-1.pdf]

# **Oxidation shuts down an auto-inhibitory mechanism of von Willebrand factor**

Rachel Tsai and Gianluca Interlandi

Supplemental data

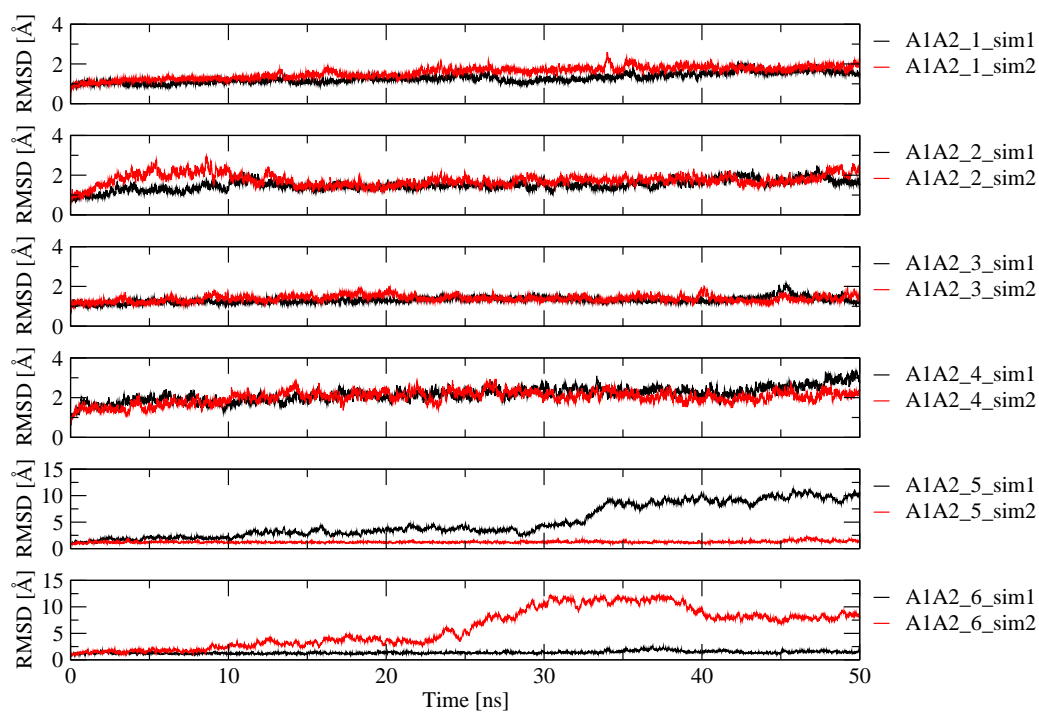

Figure S1: Time series of the  $C_{\alpha}$  RMSD from the initial conformation along the simulations with the A1A2 complex models.

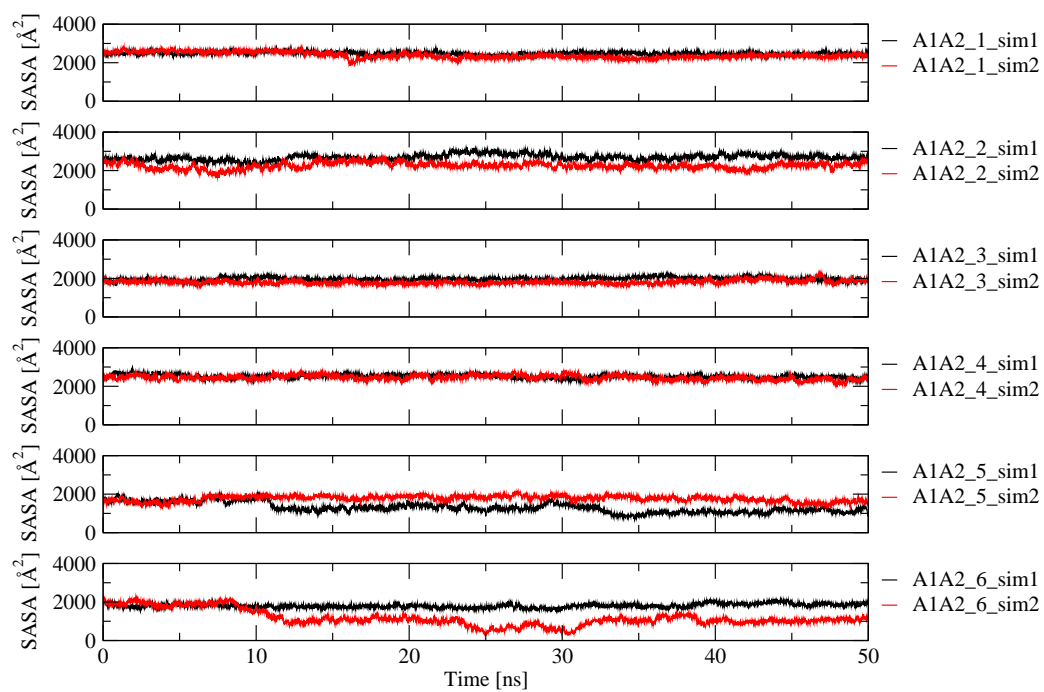

Figure S2: Time series of the SASA buried at the inter-domain interface along the simulations with the A1A2 complex models.
